# Supplementary material
Source: Springer Nature journal article supplement (https://www.springermedizin.de/resource/supplementary/13633_2011_22_MOESM2_ESM.pdf/9595530)

Urine Nonglycosylated-AQP2  
(pmol/mg Cr)

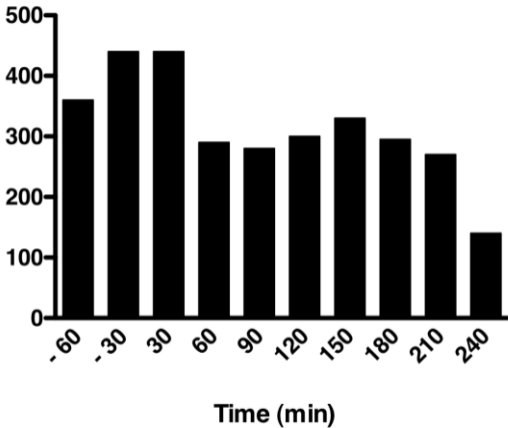

Supplement: MOESM2 [file 9595530]
